# Supplementary material for: Conservation of cell-intrinsic immune responses in diverse nonhuman primate species
Source: Life Sci Alliance. 2019 Oct 24;2(5):e201900495. doi: 10.26508/lsa.201900495 (PMC6814850; doi:10.26508/lsa.201900495)
Supplement: Supplementary file 10 [file LSA-2019-00495_SdataF5.xls]

## Sheet: SpeciesGenomeMapped
pathway	bonobo	chimpanzee	gorilla	olive_baboon	orangutan	pigtailed_macaque	rhesus_macaque	squirrel_monkey	human_related_bonobo	human_related_chimpanzee	human_related_gorilla	human_related_olive_baboon	human_related_orangutan	human_related_pigtailed_macaque	human_related_rhesus_macaque	human_related_squirrel_monkey
hsa04630 Jak-STAT signaling pathway	0.0233128	0.000597419	0.00802929	0.0279469	0.000952845	0.0231577	0.152995	0.00493143	0.00367086	0.00264009	0.00115388	0.00368449	0.00318813	0.0024085	0.0036239	0.00506519
hsa04514 Cell adhesion molecules (CAMs)	0.000485237	0.00106599	0.00437331	0.0187991	0.00386891	0.0853763	0.152995	0.00826218	0.00306806	0.00148313	0.00359874	0.00368449	0.00318813	0.0061355	0.00739007	0.0101989
hsa04640 Hematopoietic cell lineage	0.00447489	0.000957432	0.00454927	0.0279469	4.59448e-05	0.0608176	0.207419	0.00302489	0.00367086	0.00332148	0.00115388	0.00368449	0.00318813	0.0024085	0.00489186	0.00506519
hsa04620 Toll-like receptor signaling pathway	0.0114887	0.00403392	0.0208672	0.0466136	0.00807427	0.0231577	0.152995	0.00889382	0.00593831	0.00468093	0.00974973	0.00978202	0.00750884	0.00551704	0.00945991	0.0156114
hsa04623 Cytosolic DNA-sensing pathway	0.0121323	0.0054763	0.00908506	0.0279469	0.00807427	0.0231577	0.152995	0.0331006	0.0178742	0.00975584	0.0169781	0.0138664	0.0112683	0.0061355	0.00975091	0.0156114
hsa04062 Chemokine signaling pathway	0.000485237	0.000349609	0.00437331	0.0466136	0.00384783	0.0715385	0.275136	0.00826218	0.00286771	0.00148313	0.00327454	0.00373471	0.00750884	0.00551704	0.00858999	0.00640709
hsa04621 NOD-like receptor signaling pathway	0.014789	0.013768	0.0154507	0.0861497	0.021053	0.0231577	0.239503	0.00924812	0.00796441	0.0180707	0.0141563	0.0138664	0.0408958	0.00984717	0.0134654	0.0228577
hsa04622 RIG-I-like receptor signaling pathway	0.0847968	0.0618246	0.0348001	0.0466136	0.0507321	0.0249004	0.152995	0.0164996	0.0413176	0.0521999	0.0217416	0.018853	0.0527564	0.0265917	0.0439618	0.0426471
hsa04020 Calcium signaling pathway	0.0149971	0.0366211	0.0154507	0.307395	0.0128188	0.128786	0.35165	0.251523	0.143706	0.133512	0.102554	0.0772532	0.075515	0.090911	0.115805	0.137906
hsa04612 Antigen processing and presentation	0.0260043	0.0054763	0.0328308	0.144884	0.00807427	0.56896	0.956791	0.134808	0.0227258	0.00422189	0.0217416	0.0257658	0.0227262	0.0507585	0.0875592	0.0622395
hsa04672 Intestinal immune network for IgA production	0.054775	0.0672273	0.21197	0.421964	0.0172231	0.417891	0.286737	0.064342	0.112506	0.152915	0.0630986	0.089461	0.0522687	0.114238	0.110163	0.0622395
hsa04210 Apoptosis	0.175185	0.117711	0.247123	0.34395	0.239809	0.151434	0.956791	0.010545	0.112506	0.0631355	0.0827578	0.0846589	0.175913	0.0582882	0.0705681	0.0622395
hsa04650 Natural killer cell mediated cytotoxicity	0.14192	0.0710629	0.189452	0.421964	0.0507321	0.527785	0.842381	0.156295	0.112506	0.0348943	0.0827578	0.0602403	0.0408958	0.114238	0.110163	0.147939
hsa04380 Osteoclast differentiation	0.383534	0.193393	0.322272	0.307395	0.0445634	0.146009	0.740554	0.00826218	0.461075	0.229784	0.374583	0.273735	0.282874	0.327101	0.230431	0.320419
hsa04610 Complement and coagulation cascades	0.0638171	0.025301	0.522196	0.918557	0.0092361	0.999865	0.552391	0.148346	0.102806	0.0647696	0.0861808	0.526051	0.0531074	0.327557	0.110163	0.137906
hsa04145 Phagosome	0.0929859	0.232658	0.322272	0.500933	0.0569288	0.999865	0.99785	0.999998	0.310959	0.211377	0.458691	0.486127	0.317489	0.638719	0.659992	0.706454

## Sheet: HumanGenomeMapped
pathway	bonobo	chimpanzee	gorilla	olive_baboon	orangutan	pigtailed_macaque	rhesus_macaque	squirrel_monkey	human_related_bonobo	human_related_chimpanzee	human_related_gorilla	human_related_olive_baboon	human_related_orangutan	human_related_pigtailed_macaque	human_related_rhesus_macaque	human_related_squirrel_monkey
hsa04640 Hematopoietic cell lineage	0.00297187	0.000746632	0.00595065	0.0279963	0.000393534	0.0392997	0.254291	0.00610888	0.00430151	0.00147294	0.0015277	0.00352071	0.00895096	0.00246739	0.00221809	0.0064542
hsa04514 Cell adhesion molecules (CAMs)	0.000913643	0.000581445	0.00595065	0.0255097	0.000531539	0.0501724	0.243347	0.0148101	0.00332877	0.00147294	0.00233237	0.00352071	0.00895096	0.00562117	0.00498152	0.00861754
hsa04630 Jak-STAT signaling pathway	0.0503128	0.00044968	0.0153018	0.0279963	0.0018137	0.0224604	0.243347	0.00849873	0.00430151	0.00147294	0.0015277	0.00352071	0.00895096	0.00246739	0.00221809	0.0064542
hsa04062 Chemokine signaling pathway	0.000793121	0.00044968	0.00595065	0.0798516	0.0018137	0.0452211	0.263488	0.00849873	0.00303623	0.00121473	0.00233237	0.00352071	0.00895096	0.00540115	0.00882838	0.00709684
hsa04620 Toll-like receptor signaling pathway	0.0156351	0.00489082	0.033104	0.056139	0.011178	0.0224604	0.243347	0.00914935	0.00611234	0.00446227	0.0093553	0.0131875	0.00895096	0.00540115	0.00882838	0.0181746
hsa04623 Cytosolic DNA-sensing pathway	0.0156351	0.00812535	0.0153018	0.0402939	0.00990857	0.0224604	0.243347	0.0271418	0.0160061	0.00813278	0.0155947	0.0173628	0.0111245	0.00614098	0.00882838	0.0181746
hsa04621 NOD-like receptor signaling pathway	0.0156351	0.0132218	0.0196042	0.103885	0.0324353	0.0224604	0.277026	0.00914935	0.00851552	0.0157077	0.0155947	0.0161536	0.039951	0.0120145	0.0144935	0.0212167
hsa04622 RIG-I-like receptor signaling pathway	0.132714	0.0692377	0.033104	0.056139	0.0645956	0.0316854	0.243347	0.0148101	0.0439893	0.0471239	0.0241628	0.0263407	0.0662215	0.0270692	0.0470479	0.0540607
hsa04020 Calcium signaling pathway	0.0324847	0.0682194	0.033104	0.22239	0.031062	0.0830035	0.551517	0.156123	0.139259	0.158381	0.103734	0.0700991	0.0730176	0.0870059	0.0783046	0.11653
hsa04672 Intestinal immune network for IgA production	0.0615157	0.0692377	0.233	0.411597	0.0018137	0.367018	0.277026	0.0821731	0.123495	0.158381	0.0698537	0.0874656	0.0854211	0.0960866	0.076916	0.0550817
hsa04612 Antigen processing and presentation	0.0324847	0.00705227	0.033104	0.411597	0.00458751	0.621153	0.957646	0.15407	0.0239156	0.00441913	0.0221757	0.0309074	0.026613	0.0447061	0.0667156	0.0675056
hsa04210 Apoptosis	0.211036	0.122376	0.320935	0.411597	0.438315	0.156039	0.957646	0.0148101	0.123495	0.0578165	0.083791	0.0908348	0.180047	0.0596327	0.0667017	0.0708506
hsa04650 Natural killer cell mediated cytotoxicity	0.215897	0.0682194	0.287505	0.594565	0.0611759	0.553069	0.842922	0.208157	0.123495	0.0249463	0.0562319	0.0594182	0.039951	0.0742348	0.0783046	0.151697
hsa04610 Complement and coagulation cascades	0.0615157	0.0237855	0.397733	0.647187	0.00630363	0.999883	0.59135	0.125611	0.0731804	0.0471239	0.0997708	0.286275	0.0365418	0.335722	0.0958876	0.131887
hsa04380 Osteoclast differentiation	0.450977	0.25415	0.487674	0.411597	0.0414313	0.361206	0.957646	0.00849873	0.593693	0.2674	0.333766	0.265247	0.349369	0.275459	0.219911	0.333355
hsa04145 Phagosome	0.0950489	0.130657	0.320935	0.594565	0.024047	0.999883	0.999028	0.999999	0.462781	0.24502	0.568901	0.53507	0.396374	0.541962	0.501653	0.730281
